# Supplementary material
Source: publisher site journal article supplement (https://www.dovepress.com/article/supplementary_file/533633/533633%20Revised%20Supplementary%20Material.docx)
Supplement: Supplementary file 1 [file 533633%20Revised%20Supplementary%20Material.docx]

**Supplementary Table 1** Prevalence of IgE-reactive protein bands in grass and weed pollen species based on immunoblot analysis

| **Species** | **MW (kDa)** | **% Prevalence** | **Putative grass pollen allergen group**23–25 | **Allergen characteristics** 23–25 |
| --- | --- | --- | --- | --- |
| Cd  (Bermuda grass)  (20 bands) | 30 | 64.62* | 1 | Beta-expansin,  acidic glycoprotein |
| 63 | 49.23 | 4 | Flavoenzymes,  basic glycoprotein |
| 60 | 46.15 | 4, 13 | Flavoenzymes,  basic glycoprotein, or polygalacturonase,  pectin-degrading enzyme |
| Um  (para grass)  (21 bands) | 63 | 58.46* | 4 | Flavoenzymes,  basic glycoprotein |
| 50 | 50.77* | 4, 13 | Flavoenzymes,  basic glycoprotein, or polygalacturonase,  pectin-degrading enzyme |
| 30 | 44.62 | 1 | Beta-expansin,  acidic glycoprotein |
| Sh  (Johnson grass)  (23 bands) | 30 | 66.15* | 1 | Beta-expansin,  acidic glycoprotein |
| 63 | 61.54* | 4 | Flavoenzymes,  basic glycoprotein |
| 60 | 36.92 | 4, 13 | Flavoenzymes,  basic glycoprotein, or polygalacturonase,  pectin-degrading enzyme |
| Zm  (Manila grass)  (20 bands) | 63 | 50.77* | 4 | Flavoenzymes,  basic glycoprotein |
| 30 | 49.23 | 1 | Beta-expansin,  acidic glycoprotein |
| 34 | 38.46 | 1 | Beta-expansin,  acidic glycoprotein |
| Cm  (nutsedge)  (21 bands) | 75 | 40.00 | n.d. | n.d. |
| 25 | 38.46 | n.d. | n.d. |
| 48, 65 | 36.92 | n.d. | n.d. |
| Ah  (careless weed)  (17 bands) | 63 | 23.08 | n.d. | n.d. |
| 48 | 18.46 | n.d. | n.d. |
| 40 | 7.69 | n.d. | n.d. |

* Major allergen (≥ 50% prevalence); n.d. = no data.

% Prevalence = (total number of bands/number of patients) × 100.


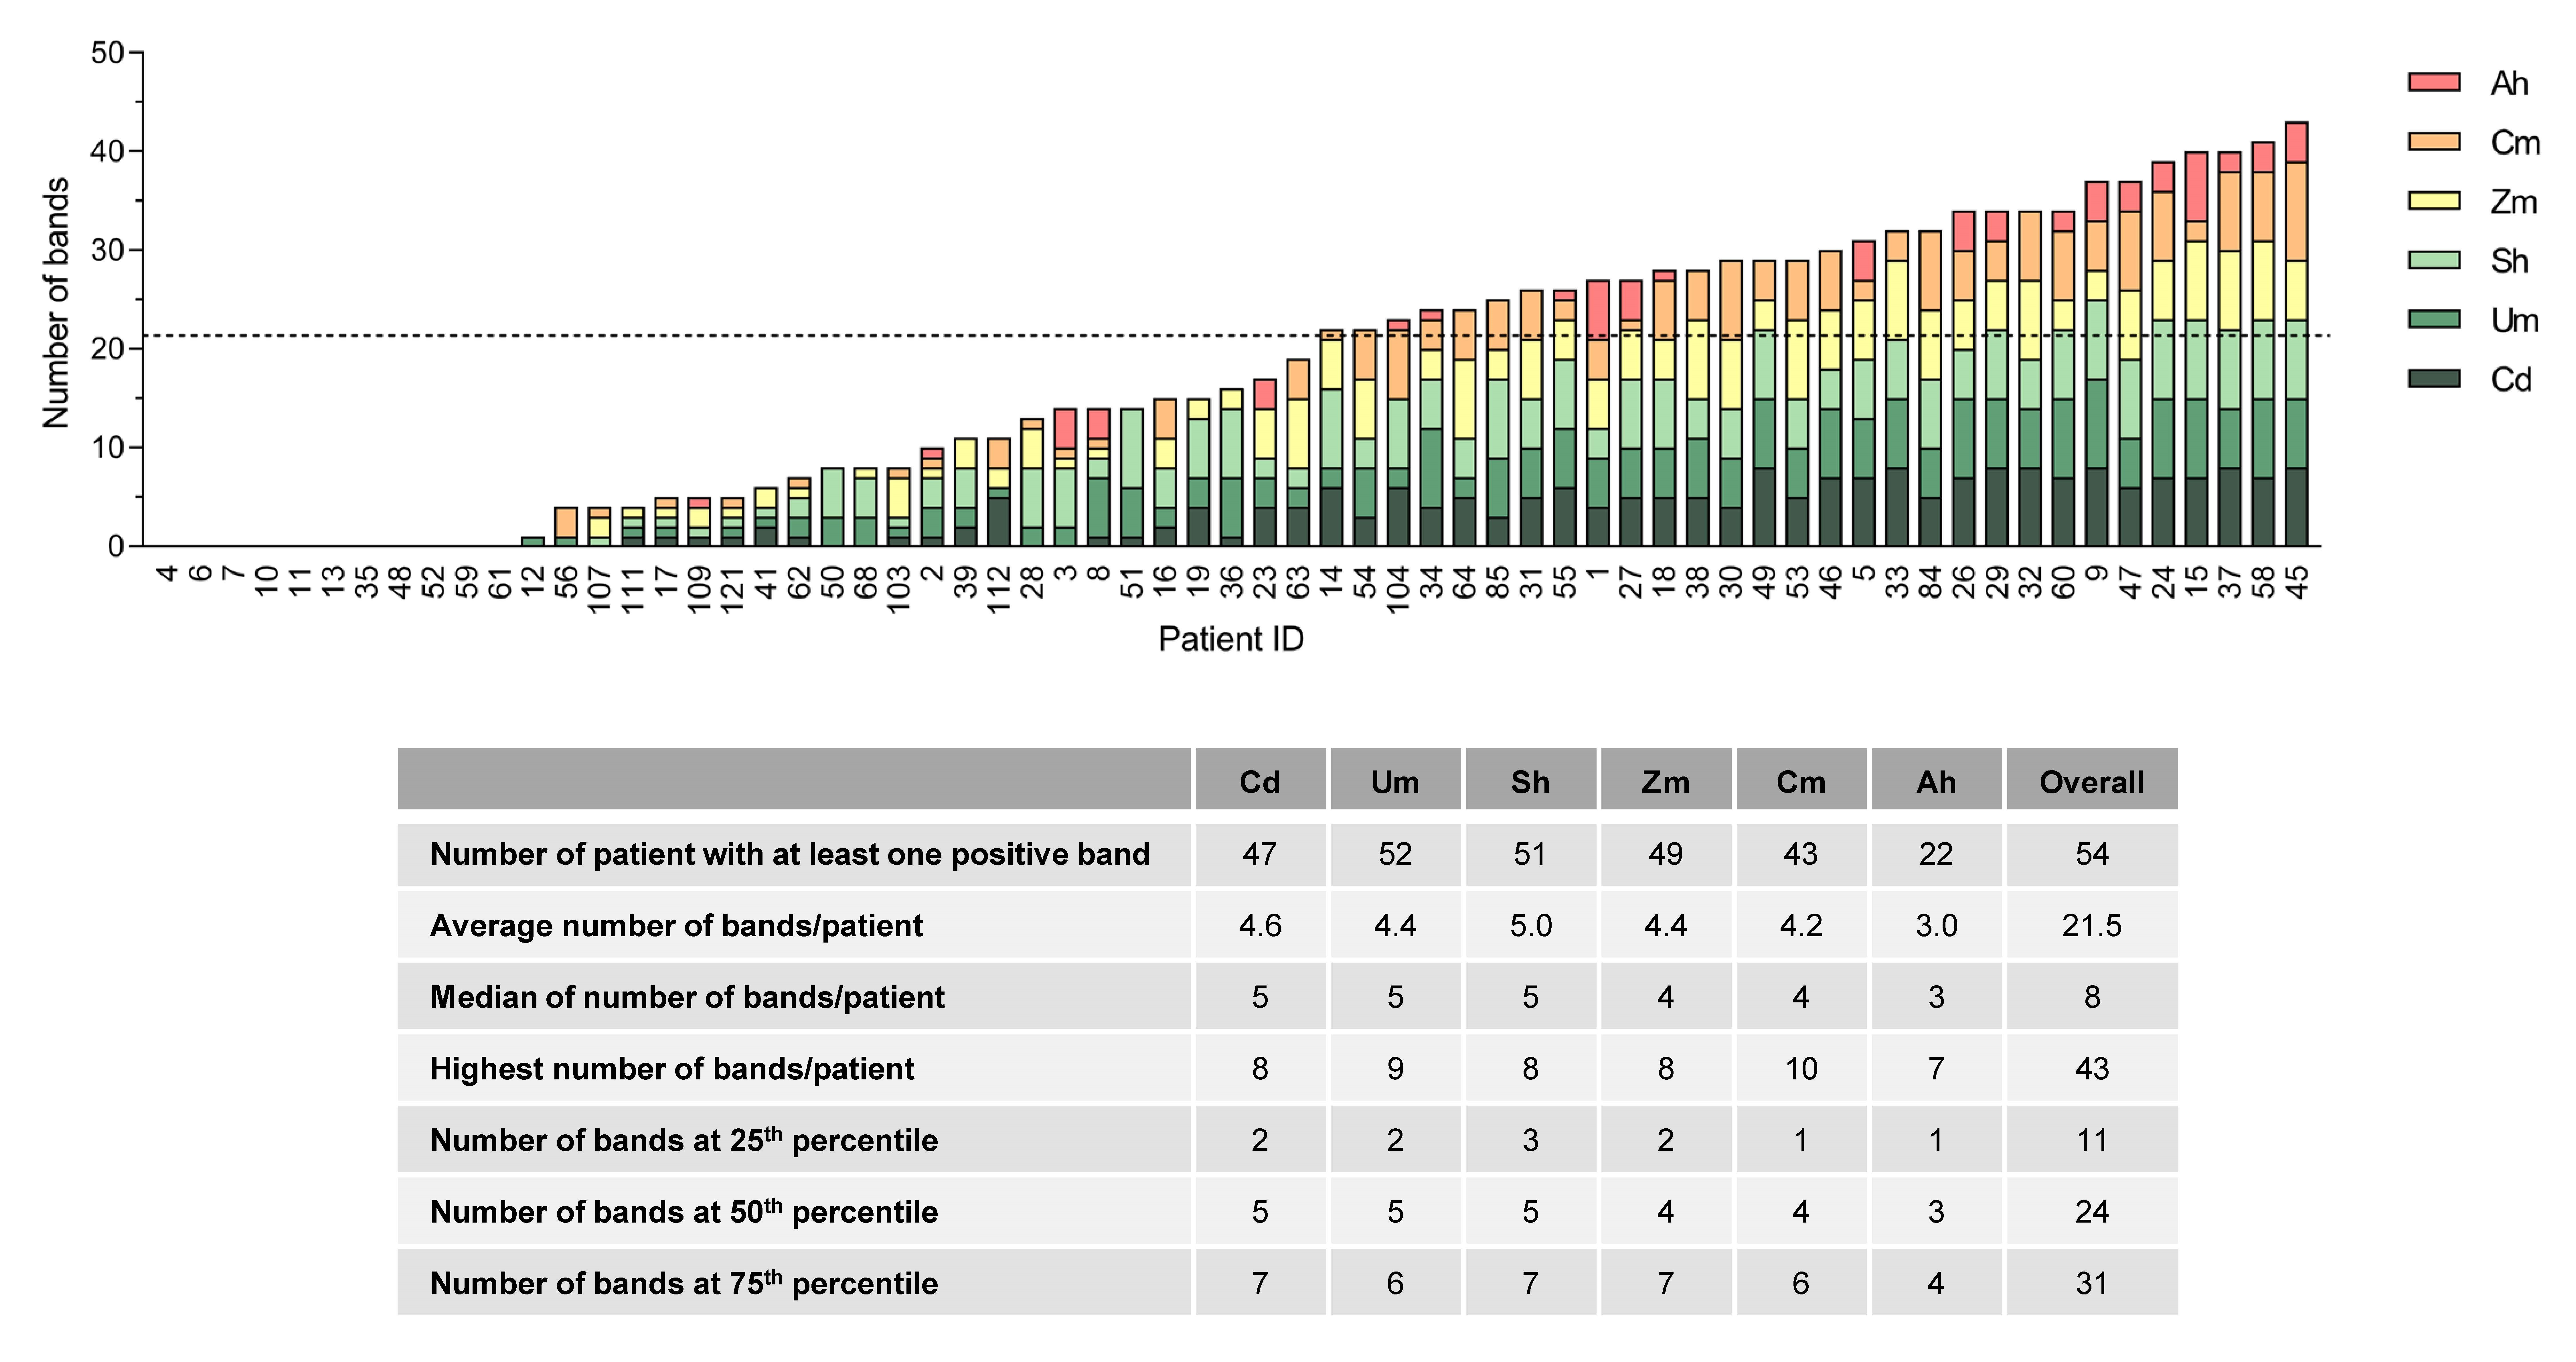


**Supplementary Fig. 1** Number of detectable allergen-specific IgE-reactive bands per patient in immunoblot analysis. Each bar graph represents the number of IgE-reactive bands detected in the immunoblot assay for an individual AR patient (n = 65). Dashed line represents the overall average number of bands per patient (21.5 bands). The table summarizes number of patients with at least one positive band, average number of bands/patient, median of number of bands/patient, highest number of bands/patient, and number of bands at 25th, 50th, and 75th percentile. Grasses: Cd - *Cynodon dactylon* (Bermuda grass), Um - *Urochloa mutica* (para grass), Sh - *Sorghum halepense* (Johnson grass), Zm - *Zoysia matrella* (Manila grass). Weeds: Cm - *Cyperus mitis* (nutsedge), Ah - *Amaranthus hybridus* (careless weed).
